# Supplementary material for: Cystatin F is a biomarker of prion pathogenesis in mice
Source: PubMed Central journal article supplement (PMC5298286; doi:10.1371/journal.pone.0171923), 2017-02-08
Supplement: pone.0171923.s006.pdf [file pone.0171923.s006.pdf]

Cst7

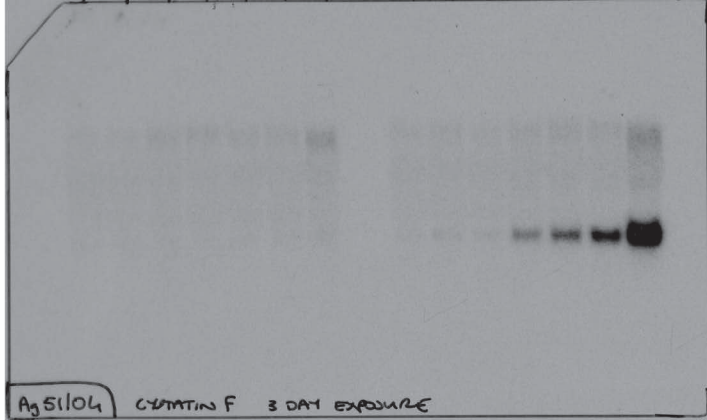

Serpina3n

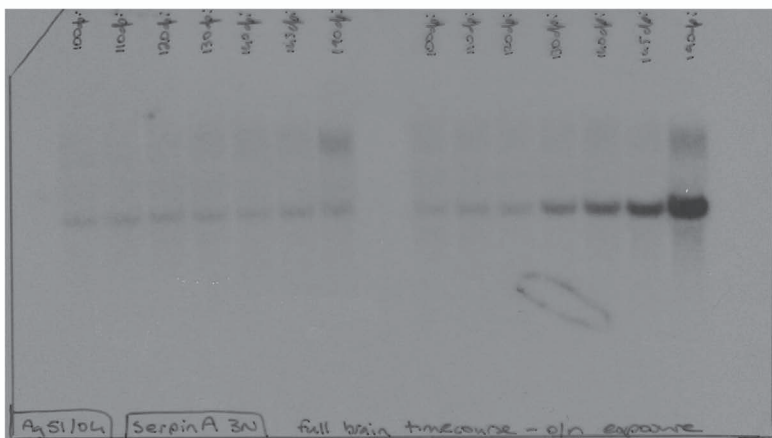

Gfap

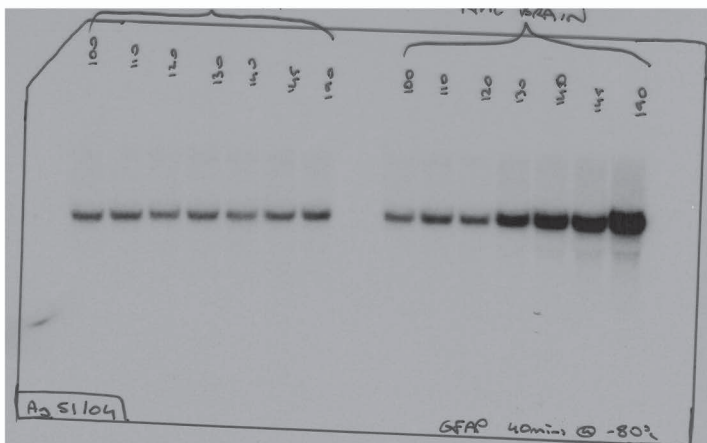

Rn18s

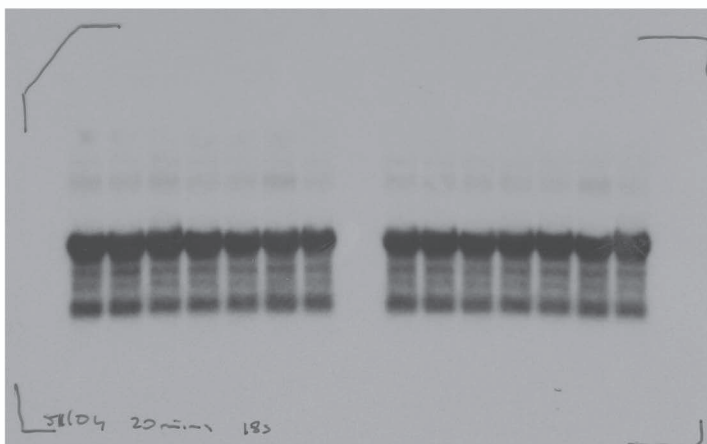

Cst7

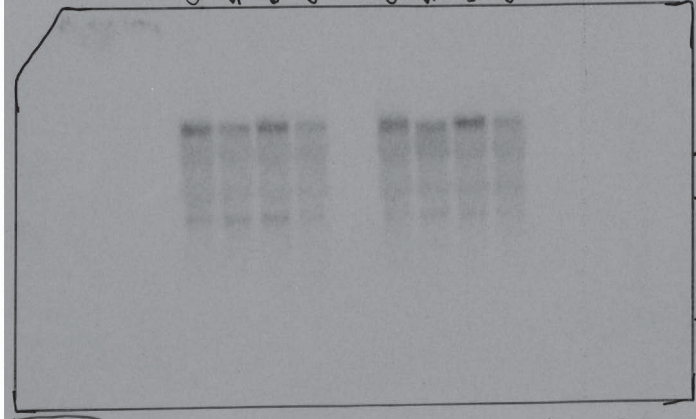

Serpina3n

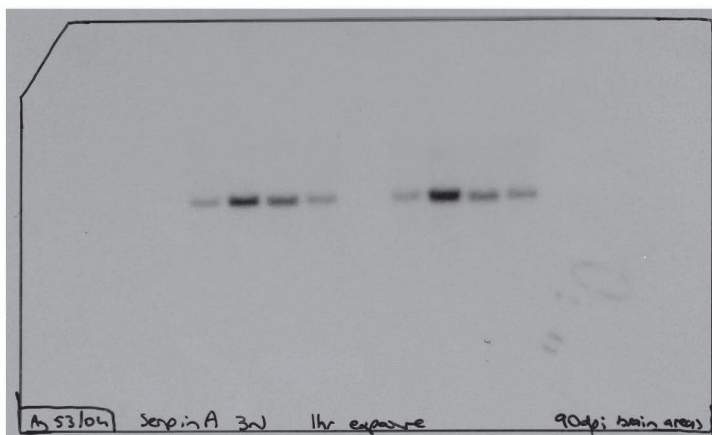

Gfap

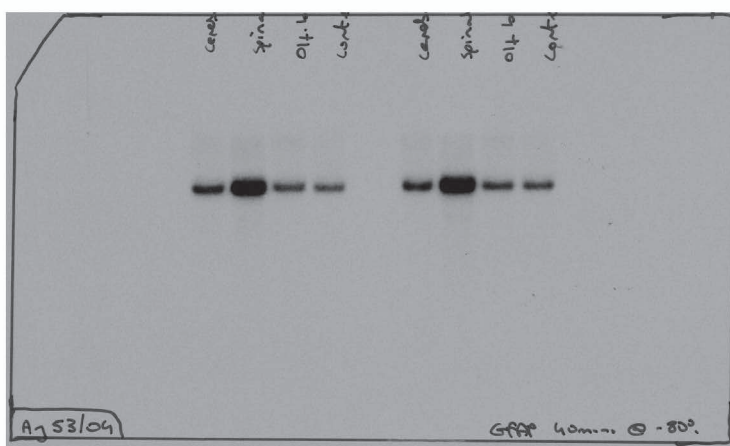

Rn18s

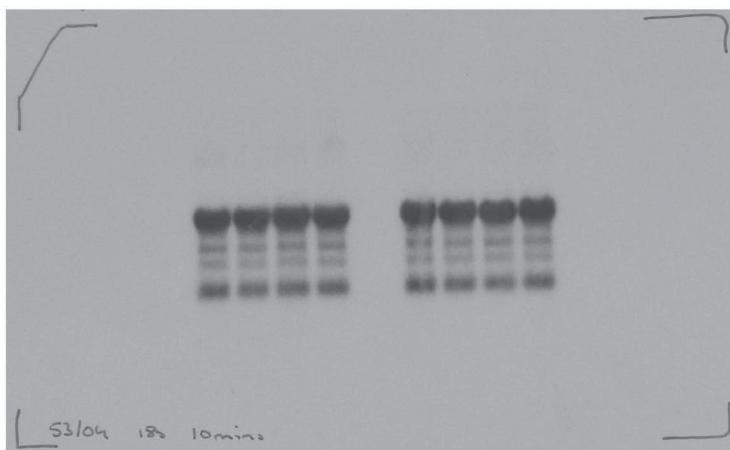

Cst7

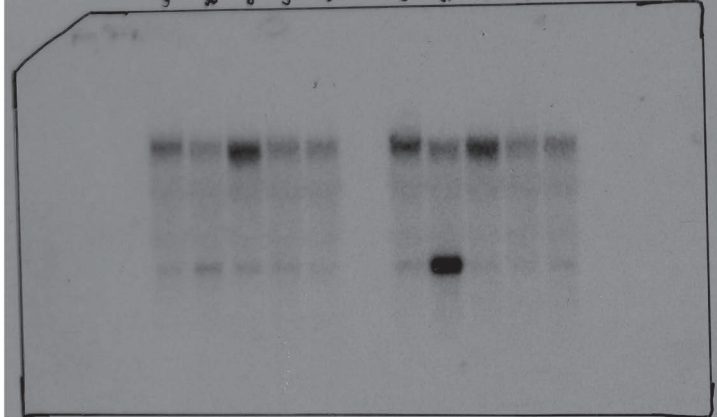

Serpina3n

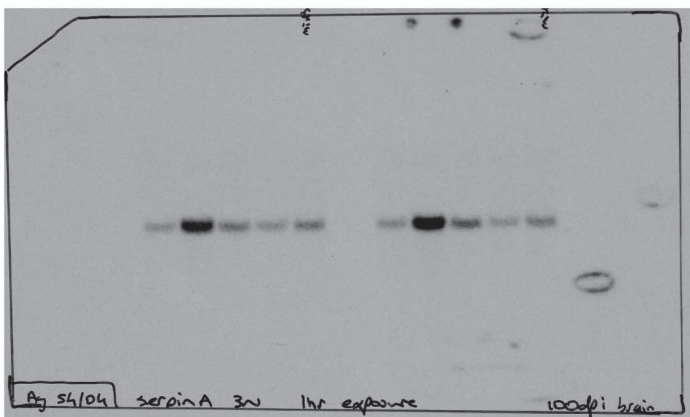

Gfap

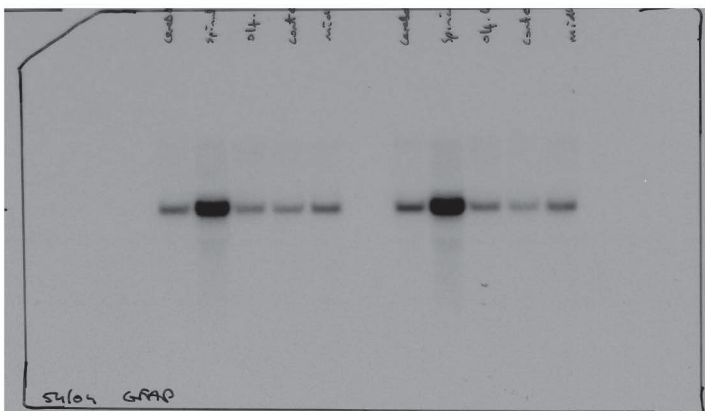

Rn18s

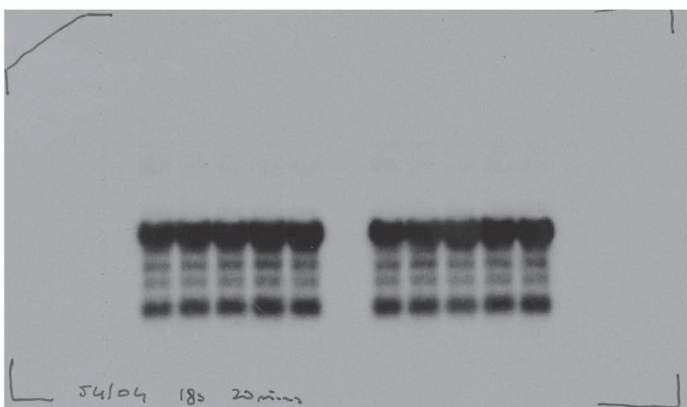

Cst7

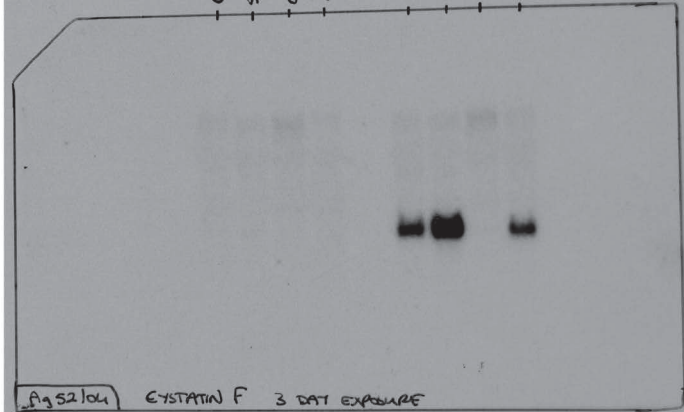

Serpina3n

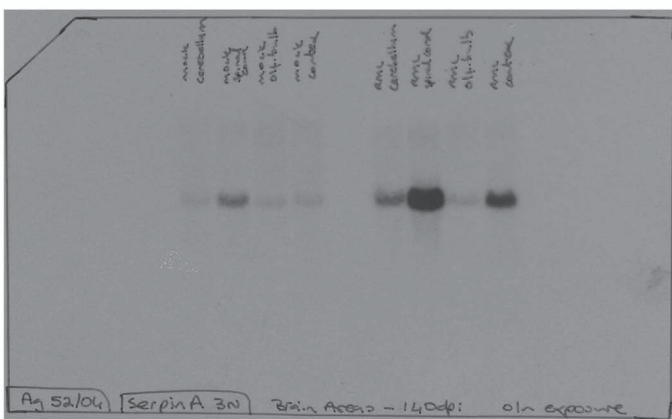

Gfap

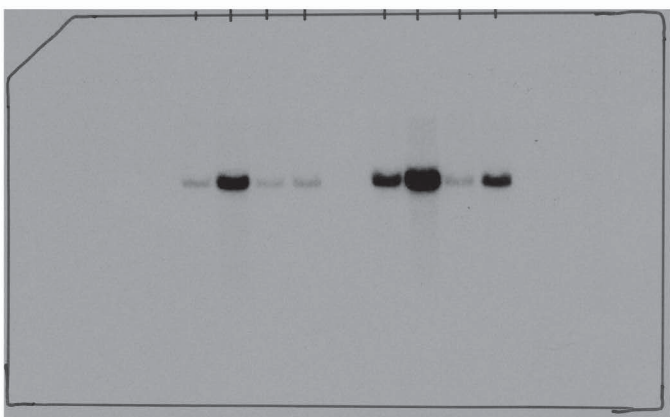

Rn18s

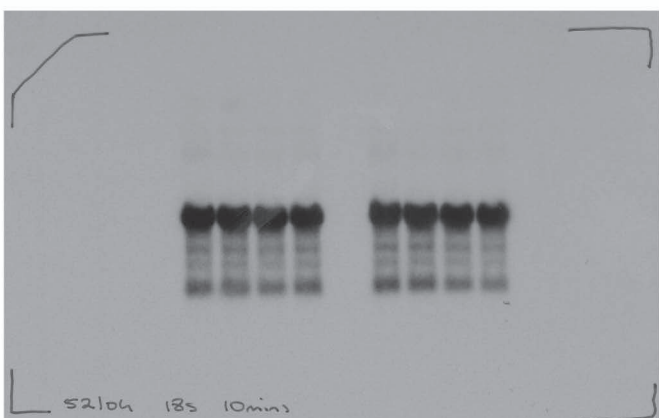

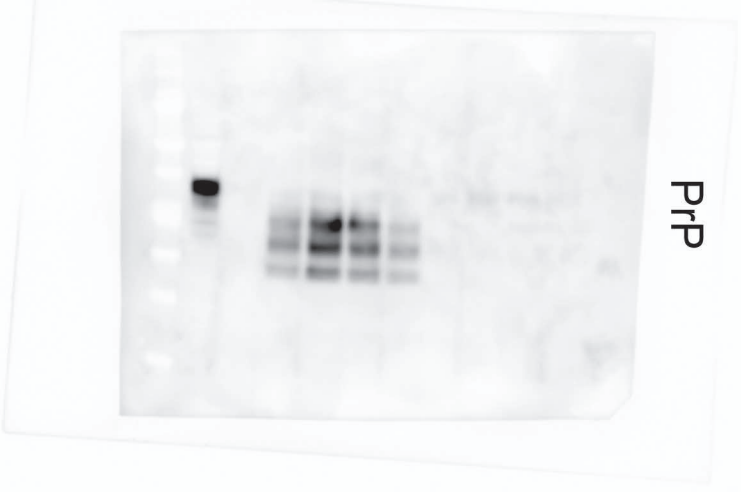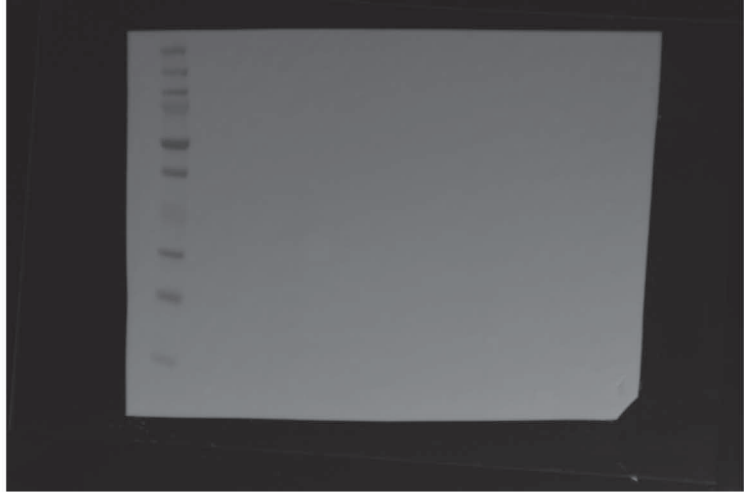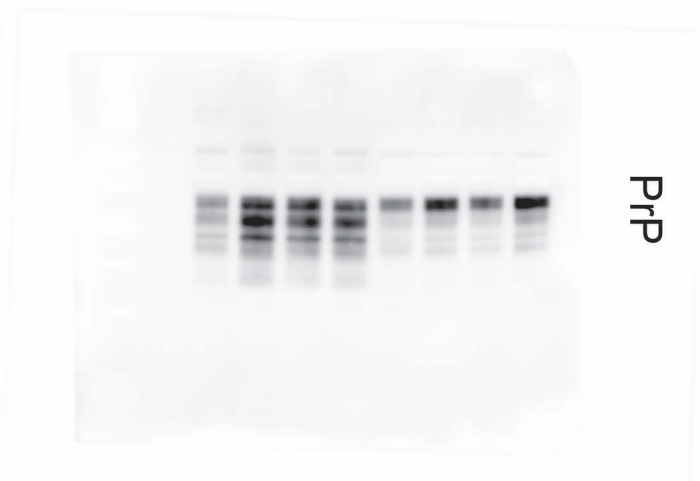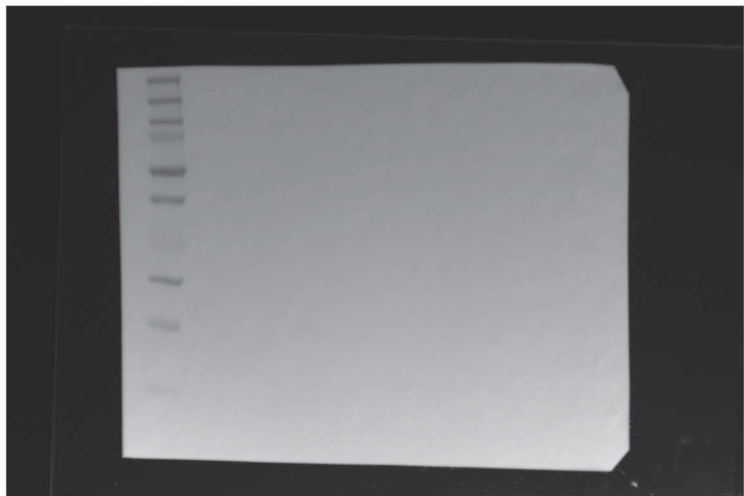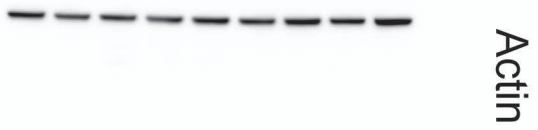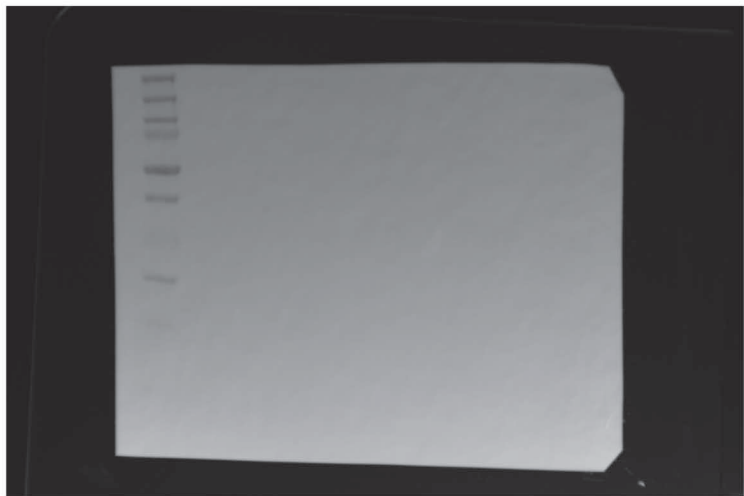

Uncropped images Fig 3

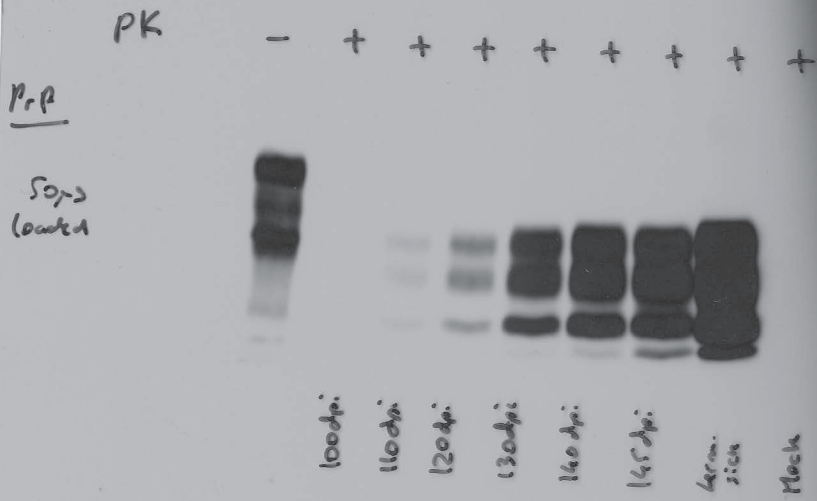

ACTIN

20- $\mu$ s loaded

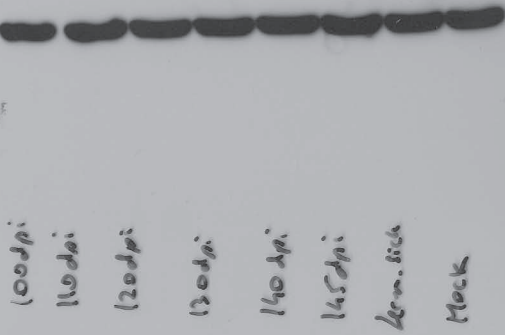

15'
