# Supplementary material for: Cystatin F is a biomarker of prion pathogenesis in mice
Source: PLoS One. 2017 Feb 8;12(2):e0171923. doi: 10.1371/journal.pone.0171923 (PMC5298286; doi:10.1371/journal.pone.0171923)
Supplement: S4 Table — (XLSX) [file pone.0171923.s010.xlsx]

## Sheet: Sheet1
Brain 145dpi
PM MM Model
Differences greater than 1.3 fold
90% confidence
p Value < 0.05
chip	probe set	Gene symbol or probe ID	Accession	NBH-A	NBH-B	NBH-C	NBH-A call	NBH-B call	NBH-C call	RML-A	RML-B	RML-C	RML-A call	RML-B call	RML-C call	fold change	P call % of Mocks	P call % of RMLs	p value
chip MOE430A	1419202_at	Cst7	NM_009977	9.8	12.36	8.46	A	A	A	92.85	84.93	87.98	P	P	P	8.68	0	100	0.00153913
chip MOE430A	1426508_at	Gfap	BB183081	793.09	809.88	798.74	P	P	P	2901.42	2954.19	2868.29	P	P	P	3.63	100	100	0.000104906
chip MOE430A	1453612_at	Nek1	AV254337	11.32	14.04	10.25	A	A	P	30.28	51.06	44.79	P	P	P	3.54	33	100	0.0333451
chip MOE430A	1426509_s_at	Gfap	BB183081	715.9	701.31	710.35	P	P	P	2758.88	2415.72	2287.16	P	P	P	3.51	100	100	0.00599421
chip MOE430A	1436655_at	Lonp2	BE986653	13.53	16.61	19.15	A	A	P	51.46	43.16	47.21	P	P	P	2.88	33	100	0.0131195
chip MOE430A	1418021_at	C4a	NM_009780	389.06	384.57	354.59	P	P	P	1097.91	1006.11	1051.45	P	P	P	2.8	100	100	0.00163113
chip MOE430A	1417381_at	C1qa	NM_007572	455.44	440.06	434.57	P	P	P	1342.52	1233.25	1088.39	P	P	P	2.75	100	100	0.00750012
chip MOE430A	1437726_x_at	C1qb	BB111335	39.81	37.45	34.86	P	P	P	73.6	106.61	112.16	P	P	P	2.61	100	100	0.0460222
chip MOE430A	1420806_at	Fgf16	NM_030614	17.08	24.07	15.11	A	M	A	53.62	43.31	41.99	P	P	P	2.47	0	100	0.0314527
chip MOE430A	1422903_at	Ly86	NM_010745	219.71	225.02	226.14	P	P	P	544.45	547.66	501.2	P	P	P	2.37	100	100	0.0027716
chip MOE430A	1450148_at	Mcoln3	NM_134160	70.67	76.5	78.45	P	P	P	153.47	184.06	176.65	P	P	P	2.28	100	100	0.00558433
chip MOE430A	1427076_at	Mpeg1	L20315	192.21	184.6	188.88	P	P	P	416.4	449.62	374.68	P	P	P	2.19	100	100	0.010176
chip MOE430A	1450792_at	Tyrobp	NM_011662	267.71	274.66	258.59	P	P	P	552.66	582.41	538.57	P	P	P	2.09	100	100	0.000862699
chip MOE430A	1449401_at	C1qc	NM_007574	526.23	526.62	514.99	P	P	P	1065.13	1165.32	1036.53	P	P	P	2.08	100	100	0.00412864
chip MOE430A	1420464_s_at	Pira2	NM_011093	7.49	15.5	12.48	A	P	A	19.96	26.28	27.22	P	P	P	2.07	33	100	0.00810776
chip MOE430A	1453946_a_at	Sdccag8	AK017691	49.31	50.55	40.13	P	P	P	99.14	87.4	98.32	P	P	P	2.03	100	100	0.0161294
chip MOE430A	1419768_at	Cd22	NM_009845	83.99	46.11	81.23	A	A	A	151.4	125.37	150.98	P	P	P	2.02	0	100	0.00251344
chip MOE430A	1452149_at	Ube3b	AU067784	345.76	332.14	322.61	P	P	P	662.76	709.18	643.32	P	P	P	2.01	100	100	0.00328159
chip MOE430A	1417906_at	Gm4181	NM_027940	26.05	36.96	27.21	P	P	A	59.9	65.51	56.25	P	P	P	2.01	66	100	0.00306352
chip MOE430A	1416066_at	Cd9	NM_007657	228.01	222.45	235.17	P	P	P	455.85	465.15	445.77	P	P	P	1.99	100	100	0.00166459
chip MOE430A	1418392_a_at	Gbp3	NM_018734	63.86	63.22	67.01	A	P	P	132.84	139.06	112.15	P	P	P	1.98	66	100	0.0209118
chip MOE430A	1418963_at	Fam188a	NM_024185	374.86	382.03	378.4	P	P	P	690.11	756	768.04	P	P	P	1.95	100	100	0.00394048
chip MOE430A	1417876_at	Fcgr1	AF143181	42.48	36.66	39.89	A	A	A	71.57	76.14	80.59	P	P	P	1.92	0	100	0.0100733
chip MOE430A	1426950_at	Parp16	BC014731	14.06	21.09	22.8	A	A	A	35.02	36.32	40.17	P	P	P	1.92	0	100	0.00865359
chip MOE430A	1448380_at	Lgals3bp	NM_011150	251.92	262.09	268.28	P	P	P	500.94	498.36	491.21	P	P	P	1.91	100	100	0.00101645
chip MOE430A	1425575_at	Epha3	BB292785	23.82	27.06	26.55	P	A	A	44.05	55.64	47.57	P	P	P	1.9	33	100	0.0128227
chip MOE430A	1419100_at	Serpina3n	NM_009252	267.57	274.55	284.31	A	A	A	556.14	529.07	486.8	P	P	P	1.9	0	100	0.00999082
chip MOE430A	1448591_at	Ctss	NM_021281	656.29	670.4	664.09	P	P	P	1312.75	1168.72	1236.01	P	P	P	1.87	100	100	0.00624198
chip MOE430A	1424774_s_at	Ears2	AK014324	66.2	54.36	53.44	P	A	A	114.59	106.16	104.58	P	P	P	1.87	33	100	0.00042823
chip MOE430A	1416714_at	Irf8	BC005450	63.96	61.2	50.85	P	P	P	109.35	108.34	110.11	P	P	P	1.86	100	100	0.00734728
chip MOE430A	1427275_at	Smc4	BI665051	73.16	64.58	77.42	P	P	P	127.13	135	137.82	P	P	A	1.86	100	66	0.00598364
chip MOE430A	1449289_a_at	B2m	NM_009735	700.9	701.44	711.38	P	P	P	1339.51	1351.29	1175.46	P	P	P	1.83	100	100	0.0104319
chip MOE430A	1451538_at	Sox9	BC024958	91.62	92.75	92.9	P	P	P	148.1	188.67	165.36	P	P	P	1.81	100	100	0.0225627
chip MOE430A	1418204_s_at	Aif1	NM_019467	66.95	65.21	57.33	A	P	A	108.02	126.48	107.2	P	P	P	1.8	33	100	0.0130233
chip MOE430A	1417469_at	Nit1	BM121177	82.59	83.18	83.08	P	P	P	148.48	137.46	162.26	P	P	P	1.8	100	100	0.0115168
chip MOE430A	1448620_at	Fcgr3	NM_010188	107.84	112.86	108.42	P	P	P	199.18	218.02	172.56	P	P	P	1.79	100	100	0.0186978
chip MOE430A	1422875_at	Cd84	NM_013489	41.24	43.35	40.12	P	P	P	62.38	76.75	81.48	P	P	P	1.77	100	100	0.0322176
chip MOE430A	1451860_a_at	Trim30a	AF220015	45.89	51.86	60.7	P	A	P	86.95	90.93	97.53	P	P	P	1.74	66	100	0.000980694
chip MOE430A	1460407_at	Spib	BM244106	59.62	51.78	53.2	P	P	P	101.19	80.91	102.72	P	P	P	1.73	100	100	0.0212277
chip MOE430A	1451993_at	Mau2	BI730405	371.2	361.19	348.58	P	P	P	576.59	634.84	658.04	P	P	P	1.73	100	100	0.0132215
chip MOE430A	1436996_x_at	Lyz2	AV066625	84.76	92.07	87.37	P	P	P	158.3	147.81	150.54	P	P	P	1.73	100	100	0.00641216
chip MOE430A	1437548_at	Bicd1	AV367839	115.76	120.15	126.61	P	P	P	204.64	238.86	181.44	P	P	P	1.72	100	100	0.0417402
chip MOE430A	1451474_a_at	Parp8	BC022679	43.56	48.65	49.47	A	A	P	71.25	89.73	80.9	P	P	P	1.71	33	100	0.0139649
chip MOE430A	1453196_a_at	Oasl2	BQ033138	100.3	94.55	107.28	A	P	A	180.76	151.12	183.33	P	P	P	1.71	33	100	0.0105102
chip MOE430A	1451683_x_at	H2-L	M34962	211.89	195.03	198.11	P	P	P	417.84	301.39	308.48	P	P	P	1.7	100	100	0.0494446
chip MOE430A	1432181_s_at	Tymp	AK013765	126.95	117.52	123.86	P	P	P	178.86	220.33	226.32	P	P	A	1.7	100	66	0.0367708
chip MOE430A	1451784_x_at	H2-D1	L36068	833.95	824.46	820.33	P	P	P	1501.03	1382.69	1309.51	P	P	P	1.69	100	100	0.00811
chip MOE430A	1421143_at	Diaph1	NM_007858	332.03	319.54	332.52	P	P	P	517.47	500.96	638.77	P	P	P	1.68	100	100	0.0317428
chip MOE430A	1419590_at	Cyp2b9	NM_010000	67.61	63.87	65.4	P	P	A	100.22	105.66	122.98	P	P	P	1.67	66	100	0.0263905
chip MOE430A	1422124_a_at	Ptprc	NM_011210	54.79	63.52	61.17	P	P	P	101.62	105.5	91.78	P	P	P	1.67	100	100	0.0142698
chip MOE430A	1427746_x_at	H2-K1	S70184	330.23	334.98	324.31	P	P	P	485.31	542.87	601.38	P	P	A	1.65	100	66	0.0263313
chip MOE430A	1451931_x_at	H2-D1	M69068	668.89	668.48	672.79	P	P	P	1189.08	1008.93	1109.92	P	P	P	1.65	100	100	0.0141097
chip MOE430A	1448749_at	Plek	AF181829	110.73	114.3	109.15	P	P	P	169.64	203	174.99	P	P	P	1.64	100	100	0.015627
chip MOE430A	1433842_at	Lrrfip1	BG069059	57.74	64.27	58.83	A	A	A	96.83	95.12	104.65	P	P	P	1.64	0	100	0.0123524
chip MOE430A	1438317_a_at	Endog	AV104666	144.45	163.36	127.14	P	P	P	221.25	274.78	217.32	P	P	P	1.64	100	100	0.0115924
chip MOE430A	1425545_x_at	H2-D1	M86502	879.19	856.61	874.92	P	P	P	1515.96	1350.43	1413.71	P	P	P	1.64	100	100	0.00570238
chip MOE430A	1427228_at	Palld	AF205078	318.2	324.36	307.07	P	P	P	438.18	564.96	540.51	P	P	P	1.63	100	100	0.0367947
chip MOE430A	1449164_at	Cd68	BC021637	117.63	117.2	104.14	P	P	P	172.44	190.38	186.94	P	P	P	1.62	100	100	0.0133814
chip MOE430A	1417703_at	Nectin2	NM_008990	44.47	60.65	57.78	A	P	P	79.56	93.01	87.84	P	P	P	1.6	66	100	0.00199459
chip MOE430A	1423547_at	Lyz2	AW208566	231.93	217.04	229.86	P	P	P	367.58	343.25	372.63	P	P	P	1.6	100	100	0.00126205
chip MOE430A	1422571_at	Thbs2	NM_011581	46.26	48.55	46.21	P	P	P	66.88	72.22	84.83	P	P	P	1.59	100	100	0.0381951
chip MOE430A	1433678_at	Pld4	BB210623	88.68	75.82	79.21	P	A	A	117.91	129.94	139.21	P	P	P	1.59	33	100	0.0368147
chip MOE430A	1421964_at	Notch3	NM_008716	261.37	278.2	202.46	P	P	P	364.08	418.95	396.77	P	P	P	1.59	100	100	0.0315886
chip MOE430A	1431539_at	Caps2	AK015008	34.09	30.42	28.69	A	M	P	47.56	48.84	51.34	P	P	A	1.59	33	66	0.0206348
chip MOE430A	1451799_at	Ccdc25	BC025545	79.77	77.11	81.51	P	P	P	113.92	135.19	127.47	A	P	A	1.58	100	33	0.02176
chip MOE430A	1418240_at	Gbp2	NM_010260	57.42	51.98	56.5	P	P	P	94.85	79.68	87.42	P	P	P	1.58	100	100	0.0078953
chip MOE430A	1454157_a_at	Pla2g2d	AK004232	46.64	49.98	49.48	A	A	A	78.73	65.96	84.55	P	P	P	1.57	0	100	0.0428555
chip MOE430A	1419365_at	Pex11a	AV377516	26.02	28.92	28.13	P	P	P	39.27	43.5	48	P	P	P	1.57	100	100	0.0157869
chip MOE430A	1452428_a_at	B2m	AI099111	1276.04	1263.18	1298.51	P	P	P	2158.82	1985.03	1879.63	P	P	P	1.57	100	100	0.014007
chip MOE430A	1418448_at	Rras	NM_009101	143.63	126.27	139.9	P	P	P	222.07	219.05	197.49	P	P	P	1.56	100	100	0.0174733
chip MOE430A	1420895_at	Tgfbr1	BM248342	189.74	190.76	188.56	P	P	P	318	278.5	289.79	P	P	P	1.56	100	100	0.0124552
chip MOE430A	1436542_at	Ptger1	BE948730	314.87	309.26	305.69	P	P	P	504.28	462.97	481.04	P	P	P	1.56	100	100	0.00358992
chip MOE430A	1449863_a_at	Dlx5	NM_010056	196.83	204.79	179.39	P	P	P	274.3	295.59	329.81	P	P	P	1.55	100	100	0.0417982
chip MOE430A	1421290_at	Hspb7	BG968304	42.88	51.15	55.3	A	P	P	74.3	71.74	85.81	P	P	P	1.55	66	100	0.0155291
chip MOE430A	1418925_at	Celsr1	NM_009886	53.06	56.03	57.04	A	A	A	79.87	92.49	85.74	P	P	P	1.55	0	100	0.00914835
chip MOE430A	1426499_at	Sh3glb2	AI481067	906.11	895.5	889.06	P	P	P	1358.8	1387.04	1431.34	P	P	P	1.55	100	100	0.00272902
chip MOE430A	1455053_a_at	Dcun1d1	BM228454	110.73	108.69	116.92	P	P	P	165.19	184.27	166.89	A	P	P	1.54	100	66	0.0168771
chip MOE430A	1428710_at	Rit1	AK018785	264.42	256.39	254.29	P	P	P	381.99	384.28	429.6	P	P	P	1.54	100	100	0.0156894
chip MOE430A	1428055_at	Rian	AB076245	397.73	418.88	403.15	P	P	P	636.97	634.45	602.06	P	P	P	1.54	100	100	0.00287086
chip MOE430A	1453156_s_at	Ptgr2	BE283373	105.32	105.59	104.15	P	P	P	137.68	163.93	180.09	P	P	P	1.53	100	100	0.0482037
chip MOE430A	1434366_x_at	C1qb	AW227993	182.97	160.17	191.98	P	P	P	238.98	287.84	291.61	P	P	P	1.53	100	100	0.0454429
chip MOE430A	1451349_at	Efcab7	BC020077	38.52	43.6	49.54	P	P	P	59.77	75.64	66.51	P	A	A	1.53	100	33	0.0347512
chip MOE430A	1422261_a_at	Msh3	M24919	98.22	83.42	94.91	P	P	P	131.53	143.46	149.23	P	P	A	1.53	100	66	0.0261883
chip MOE430A	1421481_at	Tnfrsf9	NM_011612	110.65	109.27	117.68	P	P	P	159.29	178.31	177.27	P	P	P	1.53	100	100	0.00980414
chip MOE430A	1425336_x_at	H2-K1	BC011306	580.75	583.64	583.96	P	P	P	931.31	877.62	866.51	P	P	P	1.53	100	100	0.00459716
chip MOE430A	1434092_at	Atg9b	AW121498	145.84	143.51	137.58	P	P	P	213.17	220.25	219.9	P	P	P	1.53	100	100	0.00334285
chip MOE430A	1425382_a_at	Aqp4	U48399	826.54	800.38	808.59	P	P	P	1333.34	1202.3	1170.78	P	P	P	1.52	100	100	0.0102087
chip MOE430A	1460218_at	Cd52	NM_013706	170.34	169.97	184.13	P	A	A	258.59	277.44	262.15	P	P	P	1.52	33	100	0.00883195
chip MOE430A	1434449_at	Aqp4	BB193413	695.49	715.94	693.9	P	P	P	1060.34	1093.65	1053.98	P	P	P	1.52	100	100	0.000205128
chip MOE430A	1421020_at	Ranbp17	BB667522	37.16	46.2	43.23	P	P	P	67.45	64.58	58.53	A	A	A	1.51	100	0	0.0430037
chip MOE430A	1416041_at	Sgk1	NM_011361	212.64	202.26	199.06	P	P	P	345.94	297.14	286.78	P	P	P	1.51	100	100	0.0175868
chip MOE430A	1436510_a_at	Lrrfip2	BE456782	256.53	255.83	258.41	P	P	P	387.85	378.37	394.81	P	P	P	1.51	100	100	0.000967042
chip MOE430A	1425348_a_at	Gm20425	BC003798	110.74	113.81	104.89	P	P	P	178.37	161.21	154.42	P	P	P	1.5	100	100	0.0134142
chip MOE430A	1415877_at	Dpysl3	NM_009468	129.92	127.19	121.19	P	P	P	196.19	176.89	193.69	P	P	P	1.5	100	100	0.0115262
chip MOE430A	1435477_s_at	Fcgr2b	BM224327	79.84	80.59	84.42	P	P	P	117.98	122.36	128.05	P	P	P	1.5	100	100	0.00152893
chip MOE430A	1422046_at	Itgam	NM_008401	63.27	71.8	68.19	P	P	P	106.56	99.1	97.3	P	P	P	1.49	100	100	0.0223666
chip MOE430A	1450649_at	Gm20503	NM_025277	630.89	603.26	587.33	P	P	P	845.59	970.48	902.99	P	P	P	1.49	100	100	0.0216864
chip MOE430A	1429412_at	Eny2	AI595744	55.28	60.72	69.74	A	P	P	87.18	88.81	101.6	P	P	P	1.49	66	100	0.00169843
chip MOE430A	1443352_at	C77614	C77614	122.13	111.68	120.73	P	P	P	179.73	183.53	162.89	P	P	P	1.48	100	100	0.0217315
chip MOE430A	1426025_s_at	Laptm5	U29539	266.99	257.07	269.22	P	P	P	375.17	411.4	389.21	P	P	P	1.48	100	100	0.011581
chip MOE430A	1421160_a_at	Rfng	NM_009053	531.38	532.79	538.98	P	P	P	834.71	776.04	761.2	P	P	P	1.48	100	100	0.00887349
chip MOE430A	1422909_at	Smc6	NM_026052	22.28	22.42	18.44	P	P	P	33.31	28.98	30.71	P	P	A	1.47	100	66	0.0290353
chip MOE430A	1424948_x_at	H2-K1	L23495	270.51	265.95	258.72	P	P	P	388.07	427.16	350.5	P	P	P	1.47	100	100	0.0258722
chip MOE430A	1448891_at	Fcrls	BC016551	331.47	328.82	332.04	P	P	P	451.2	488.18	521.34	P	P	P	1.47	100	100	0.0162481
chip MOE430A	1450193_at	Hcn1	NM_010408	234.16	226.22	229.67	P	P	P	316.79	353.02	342.87	P	P	P	1.47	100	100	0.0144306
chip MOE430A	1450779_at	Fabp7	NM_021272	699.52	701.6	685.68	P	P	P	1001.84	1095.3	980.61	P	P	P	1.47	100	100	0.00912051
chip MOE430A	1450125_at	Gata5	NM_008093	283.86	284.28	277.24	A	A	A	411.34	400.14	427.38	P	P	P	1.47	0	100	0.00583771
chip MOE430A	1451537_at	Chil1	BC005611	128.47	133.25	132.78	A	A	A	187.46	200.89	193.21	P	P	P	1.47	0	100	0.00183652
chip MOE430A	1429832_at	Ppih	AK014665	70.35	66.15	62.54	P	P	P	92.99	92.86	105.29	P	P	P	1.46	100	100	0.037732
chip MOE430A	1448640_at	Slc14a1	NM_028122	99.43	97.95	92.97	P	P	P	126.85	152.19	145.58	P	P	P	1.46	100	100	0.0356231
chip MOE430A	1438155_x_at	Pigo	BB357373	195.49	198.27	204.1	P	P	P	293.77	273.56	303.77	P	P	P	1.46	100	100	0.00744912
chip MOE430A	1422509_at	Gm10232	NM_024187	900.08	910.04	910.57	P	P	P	1291.39	1298.76	1379.76	P	P	P	1.46	100	100	0.00399611
chip MOE430A	1422341_s_at	Pla2g15	NM_133792	86.95	94.09	77.9	P	P	P	129.04	129.14	120.61	P	P	P	1.46	100	100	0.00375972
chip MOE430A	1423233_at	Cebpd	BB831146	74.47	77.53	73.59	P	P	P	105.6	115.4	108.95	P	P	P	1.46	100	100	0.003181
chip MOE430A	1452217_at	Ahnak	BE570050	134.47	138.82	133.33	P	P	P	196.75	203.71	191.29	P	P	P	1.46	100	100	0.00107054
chip MOE430A	1417383_at	Entpd5	BB810113	72.68	68.44	62.52	P	P	P	92.03	100.44	101.89	P	P	P	1.45	100	100	0.0353988
chip MOE430A	1416581_at	Wdr5	NM_080848	463.28	444.49	461.73	P	P	P	602.21	674.38	712.94	P	P	P	1.45	100	100	0.0266444
chip MOE430A	1416382_at	Ctsc	NM_009982	109.64	108.12	110.33	P	P	P	149.46	173.33	154.32	P	P	P	1.45	100	100	0.0241414
chip MOE430A	1450478_a_at	Ptpn12	NM_011203	327.28	331.82	322.71	P	P	P	441.97	486.28	495.03	P	P	P	1.45	100	100	0.0131332
chip MOE430A	1450222_x_at	Klk1b4	NM_010915	52.83	50.52	43.04	P	P	P	73.19	69.55	69.51	A	A	P	1.45	100	33	0.0107134
chip MOE430A	1422926_at	Mc2r	NM_008560	68.65	72.81	77.23	A	A	A	104.1	102.07	110.94	P	P	P	1.45	0	100	0.0031414
chip MOE430A	1418365_at	Ctsh	NM_007801	215.05	218.19	209.74	P	P	P	311.47	305.02	315.07	P	P	P	1.45	100	100	0.00306948
chip MOE430A	1450678_at	Itgb2	NM_008404	114.85	115.43	121.42	P	P	P	166.36	186.48	154.38	P	P	A	1.44	100	66	0.0421733
chip MOE430A	1423209_at	Tmem167	AA222535	105.28	100.79	105.86	P	P	P	135.13	150.5	162.23	P	P	P	1.44	100	100	0.0295429
chip MOE430A	1427206_at	Afg3l2	AW546149	214.06	212.66	189.05	P	P	P	280.23	302.73	301.02	P	P	P	1.44	100	100	0.0211905
chip MOE430A	1423531_a_at	Hnrnpa1l2-ps	BI663320	182.77	191.51	183.73	P	P	P	282.96	268.74	252.88	P	P	P	1.44	100	100	0.0125557
chip MOE430A	1434995_s_at	Dedd	BE199280	159.67	163.95	163.63	P	P	P	219.27	241.82	241.27	P	P	P	1.44	100	100	0.00704876
chip MOE430A	1423555_a_at	Ifi44	BB329808	60.13	60.06	58.98	P	P	P	87.86	82.44	87.77	A	P	P	1.44	100	66	0.00564121
chip MOE430A	1416560_at	Slc13a3	NM_054055	114.95	104.44	104.67	P	P	P	159.46	158.12	150.41	P	P	P	1.44	100	100	0.00356853
chip MOE430A	1451969_s_at	Parp3	BC014870	81.07	76.06	78.84	P	A	A	115.03	113.95	110.73	P	P	P	1.44	33	100	0.00257918
chip MOE430A	1421444_at	Pgr	NM_008829	165.14	171.11	173.07	P	P	P	217.49	257.73	255.59	P	P	P	1.43	100	100	0.0207539
chip MOE430A	1416226_at	Arpc1b	BC010275	168.19	172.53	169.82	P	P	P	227.47	248.97	255.99	P	P	P	1.43	100	100	0.011107
chip MOE430A	1415677_at	Dhrs1	NM_026819	352.55	340.54	330.22	P	P	P	497.9	502.45	459.12	P	P	P	1.43	100	100	0.00426849
chip MOE430A	1455281_at	Wdr33	BB520667	98.37	102.64	99.03	P	P	P	150.12	132	145.12	P	P	P	1.42	100	100	0.0242219
chip MOE430A	1420780_at	Ascl3	NM_020051	156.74	158.45	164.23	P	P	P	227.06	209.08	246.82	P	P	P	1.42	100	100	0.0183085
chip MOE430A	1449556_at	H2-T23	NM_010398	219.57	200.1	208.65	P	P	P	286.87	298.15	305.25	P	P	P	1.42	100	100	0.0129067
chip MOE430A	1431056_a_at	Lpl	AK017272	116.01	117.8	113.65	P	A	A	153.44	162.75	172.97	P	P	P	1.41	33	100	0.0179855
chip MOE430A	1424750_at	Zbtb1	BC012239	56	57.97	66.03	P	P	P	82.86	85.88	85.94	P	P	P	1.41	100	100	0.0100145
chip MOE430A	1417063_at	C1qb	NM_009777	965.99	944.36	946.35	P	P	P	1324.91	1248.67	1427.57	P	P	P	1.4	100	100	0.0182821
chip MOE430A	1418710_at	Cd59b	NM_007652	398.6	408.18	394.52	P	P	P	540.05	556	585.36	P	P	P	1.4	100	100	0.00926352
chip MOE430A	1417300_at	Smpdl3b	NM_133888	218.57	199.04	210.03	P	P	P	289.22	296.5	292.47	P	P	P	1.4	100	100	0.00851893
chip MOE430A	1453985_at	Ercc6l2	AK002307	37.17	40.39	36.93	A	P	A	54.63	53.3	52.77	P	P	P	1.4	33	100	0.00738949
chip MOE430A	1419043_a_at	Iigp1	BM239828	114.01	110.41	108.18	P	P	P	162.43	148.65	155.35	P	P	P	1.4	100	100	0.00512325
chip MOE430A	1438629_x_at	Grn	AV166504	813.85	838.85	813.56	P	P	P	1166.2	1164.44	1120.25	P	P	P	1.4	100	100	0.00162479
chip MOE430A	1456567_x_at	Grn	BB000455	493.17	506.21	492.03	P	P	P	698.75	693.96	694.79	P	P	P	1.4	100	100	0.000774676
chip MOE430A	1439251_at	Idua	BI133445	109.34	111.66	109.63	P	P	P	155.13	156.8	151.73	A	P	P	1.4	100	66	0.000657097
chip MOE430A	1424947_at	Dync1li1	BC023347	509.88	500.37	517.86	P	P	P	743.44	704.01	676.49	P	P	P	1.39	100	100	0.011809
chip MOE430A	1433893_s_at	Spag5	BM208112	86.39	89.42	88.44	P	P	P	125.03	124.11	117.61	P	P	P	1.39	100	100	0.00639868
chip MOE430A	1419665_a_at	Nupr1	NM_019738	181.28	174.56	176.5	A	A	A	244.69	241.17	251.65	P	P	P	1.39	0	100	0.00261473
chip MOE430A	1423648_at	Pdia6	BC006865	730.12	738.59	730.18	P	P	P	991.76	981.28	1041.58	P	P	P	1.37	100	100	0.00562992
chip MOE430A	1419563_at	Birc6	BB200954	92.06	96.16	89.35	P	P	P	126.17	128.34	126.98	P	P	P	1.37	100	100	0.00211459
chip MOE430A	1418975_at	Nckipsd	NM_030729	601.34	580.78	606.95	P	P	P	827.96	787.73	839.17	P	P	P	1.37	100	100	0.00118995
chip MOE430A	1416502_a_at	Preb	NM_016703	686.97	690.26	661.79	P	P	P	929.3	954.52	919.53	P	P	P	1.37	100	100	0.0006506
chip MOE430A	1424708_at	Tmed10	BI409239	552.09	546.02	538.33	P	P	P	742	769.59	720.38	P	P	P	1.36	100	100	0.00408959
chip MOE430A	1423760_at	Cd44	BC005676	130.4	122.64	128.43	P	P	P	178.54	171.81	169.05	P	P	P	1.36	100	100	0.00341777
chip MOE430A	1426587_a_at	Stat3	AI325183	425.76	420.22	423.75	P	P	P	556.83	592.5	566.01	P	P	P	1.35	100	100	0.00679101
chip MOE430A	1448118_a_at	Ctsd	NM_009983	1527.55	1541.75	1531.02	P	P	P	2046.13	2058.31	2097.69	P	P	P	1.35	100	100	0.000939463
chip MOE430A	1425850_a_at	Nek6	BC019524	140.71	140.07	142.02	P	P	P	189.84	183.34	195.34	P	P	P	1.34	100	100	0.00358093
chip MOE430A	1456380_x_at	Cnn3	BB490338	556.42	547.73	553.9	P	P	P	723.99	734.4	741.15	P	P	P	1.33	100	100	0.00128065
chip MOE430A	1425519_a_at	Mir5107	BC003476	223.39	229.02	225.34	P	P	P	302.11	303.31	299.3	P	P	P	1.33	100	100	0.00041119
chip MOE430A	1450942_at	Zfp830	AI530149	96.49	100.63	99.79	P	P	P	74.39	73.75	69.51	P	P	P	-1.36	100	100	0.00796793
chip MOE430A	1418681_at	Alg13	NM_026247	36.73	37.47	35.19	P	P	P	26.15	26.92	25.89	A	P	A	-1.39	100	33	0.00172439
chip MOE430A	1449421_a_at	Kcne2	NM_134110	99.73	110.26	106.87	P	P	P	69.5	73.95	71.75	P	P	P	-1.47	100	100	0.00300028
chip MOE430A	1439448_x_at	Tmed9	AV007149	353.3	356.86	352.52	P	P	P	208.32	268.83	228.28	P	P	P	-1.51	100	100	0.018974
chip MOE430A	1438415_s_at	Yipf2	AV166218	80.93	81.08	81.17	P	P	P	46.61	58.33	54.66	P	P	P	-1.52	100	100	0.0146317
chip MOE430A	1423411_at	Rbm47	AI648121	144.89	158.27	152.37	P	P	P	93.46	96.43	102.37	A	P	P	-1.56	100	66	0.00466753
chip MOE430A	1422986_at	Esrrb	NM_011934	84.95	96.4	92.28	P	P	P	47.71	64.26	61.27	A	P	P	-1.58	100	66	0.00326332
chip MOE430A	1451265_at	Ccdc115	BC019430	68.63	84.12	85.54	P	P	P	43.77	54.49	51.84	A	P	P	-1.59	100	66	0.00746704
chip MOE430A	1420989_at	Cfap97	BB825968	83.21	82.6	86.14	P	P	P	53.65	46.75	57.09	P	P	P	-1.6	100	100	0.00478816
chip MOE430A	1423600_a_at	Tcof1	AW209012	66.17	81.35	75.21	P	P	P	50.29	47.09	39.77	P	P	P	-1.62	100	100	0.0459105
chip MOE430A	1454970_at	Ptcd1	BM240002	58.05	63.43	63.52	P	P	P	41.94	39.33	32.46	P	P	A	-1.63	100	66	0.0315
chip MOE430A	1431388_at	Mphosph10	AK017490	82.35	78.11	88.29	A	A	P	56.49	49.8	44.59	A	P	A	-1.65	33	33	0.0280634
chip MOE430A	1419196_at	Hamp	NM_032541	239.14	269.49	276.34	P	P	A	161.85	145.03	168.44	P	A	P	-1.65	66	66	0.0174511
chip MOE430A	1425039_at	Itgbl1	BC020152	58.45	43.86	64.62	A	A	P	31.46	31.56	37.7	P	P	P	-1.66	33	100	0.0456631
chip MOE430A	1431332_a_at	Terf1	BG142548	38.02	38.74	28.62	P	P	M	22.36	22.8	16.41	P	P	P	-1.71	66	100	0.00667808
chip MOE430A	1421251_at	Zfp40	NM_009555	33.66	38.51	34.78	P	P	P	15.69	23.93	18.6	P	A	P	-1.84	100	66	0.00361379
chip MOE430A	1419497_at	Cdkn1b	NM_009875	73.65	74.17	69.6	P	P	P	28.31	48.32	31.58	A	A	P	-2.01	100	33	0.0235231
chip MOE430A	1417572_at	Mpg	BC014754	41.12	56.18	48.81	P	P	P	18.48	17.87	24.81	A	A	A	-2.39	100	0	0.0299298
chip MOE430A	1418549_at	Cga	NM_009889	247.93	262.96	284.59	P	P	P	137.02	84.4	103.66	A	A	A	-2.45	100	0	0.0207671
chip MOE430A	1421566_at	Pet2	NM_008821	53.07	47.32	68.74	P	P	P	18.44	19.32	27.87	A	P	P	-2.58	100	66	0.0114023
chip MOE430B	1440142_s_at	Gfap	BB750040	110.75	110.11	107.73	P	P	P	483.55	499.35	424.19	P	P	P	4.28	100	100	0.00373655
chip MOE430B	1429123_at	Rab27a	BB025283	6.17	11.77	5.63	A	A	A	24.07	26.15	14.74	P	P	P	2.76	0	100	0.0326058
chip MOE430B	1453232_at	Calr3	AK006582	10.51	13.72	15.84	P	A	A	27.47	25.68	31.48	P	P	P	2.11	33	100	0.00999248
chip MOE430B	1446114_at	1446114_at	BG075852	14.39	9.02	14.11	P	P	A	28.19	25.9	23.26	P	P	P	2.06	66	100	0.027463
chip MOE430B	1459068_at	1459068_at	AI464581	13.22	21.12	12.5	P	P	A	32.01	30.09	31.55	P	P	P	2	66	100	0.0423542
chip MOE430B	1440307_at	Gtf3c2	BB125332	29.53	19.27	23.37	A	A	A	56.48	42.67	38.76	P	P	P	1.91	0	100	0.0234874
chip MOE430B	1439355_at	Plekha5	BB490622	26.92	25.59	19.63	P	P	P	42.93	45.62	38.84	P	P	P	1.77	100	100	0.00440516
chip MOE430B	1455451_at	Kctd14	AW552116	15.16	12.84	12.89	P	A	P	25.7	19.47	24.23	P	P	P	1.7	66	100	0.0226509
chip MOE430B	1456986_at	1456986_at	BB326368	29.32	33.98	32.16	A	A	A	41.69	56.36	61.31	P	P	P	1.67	0	100	0.0485773
chip MOE430B	1441454_at	Zhx3	AV274462	101.55	103.36	110.19	P	P	P	159.86	176.91	173.27	P	P	P	1.62	100	100	0.00476333
chip MOE430B	1458181_at	9030624J02Rik	BB254081	29.41	28.34	30.81	P	P	P	44.46	51.32	44.64	P	P	P	1.59	100	100	0.0264453
chip MOE430B	1457566_at	Zfp677	BB271764	29.96	28.23	34.21	M	A	A	50.02	43.58	53.1	P	P	P	1.59	0	100	0.00606357
chip MOE430B	1428909_at	A130040M12Rik	BI683916	24.22	22.19	24.17	P	P	P	41.26	35.01	35.23	P	P	P	1.58	100	100	0.0165032
chip MOE430B	1457984_at	Crh	BM933756	92.15	95.11	93.24	P	P	P	147.62	147.58	148.09	P	P	P	1.58	100	100	0.000283812
chip MOE430B	1443735_at	Zfp934	AV111366	193.4	200.6	189.79	P	P	P	306.51	307.18	301.24	P	P	P	1.57	100	100	0.000314995
chip MOE430B	1446329_at	1446329_at	BB553888	66.13	66.95	50.83	P	P	P	93.1	94.98	98.13	P	P	P	1.56	100	100	0.0355516
chip MOE430B	1456187_at	Slc7a14	BB278836	42.43	39.29	30.97	P	P	P	64.76	55.89	53.98	P	P	P	1.55	100	100	0.00955529
chip MOE430B	1415677_at	Dhrs1	NM_026819	319.96	316.38	309.06	P	P	P	492.95	501.37	473.66	P	P	P	1.55	100	100	0.00115174
chip MOE430B	1439624_at	Ugt2b35	AA572504	71.94	65.31	71.83	P	P	P	102.52	100.37	119.87	P	A	A	1.54	100	33	0.0185601
chip MOE430B	1443814_x_at	Ctsh	BB542535	86.03	76.28	76.42	P	P	P	113.85	132.15	119.09	P	P	P	1.53	100	100	0.035066
chip MOE430B	1439006_x_at	Tmem255a	BB093996	22.55	21.28	20.51	P	P	P	36.1	32.37	29.74	P	P	P	1.53	100	100	0.0120579
chip MOE430B	1419853_a_at	Mir8115	AI552982	28.12	29.26	36.66	A	A	P	48.1	45.01	49.77	P	P	P	1.52	33	100	0.0147708
chip MOE430B	1429242_at	Inip	AK008870	41.67	43.76	39.8	P	P	P	64.43	59.83	65.42	P	P	P	1.51	100	100	0.0169113
chip MOE430B	1459740_s_at	Ucp2	AW108044	31.06	34.69	35.44	P	P	P	52.21	51.88	48.19	P	P	A	1.5	100	66	0.0196987
chip MOE430B	1448007_at	Baz2b	BE847301	87.64	84.87	83.86	M	P	P	139.87	120.18	124.33	P	P	A	1.5	66	66	0.0134897
chip MOE430B	1434376_at	Cd44	AW146109	80.48	84.19	70.71	P	P	P	120.98	115.19	114.78	P	P	P	1.49	100	100	0.0100955
chip MOE430B	1444575_at	1444575_at	AI536476	42.92	42.9	45.47	P	P	P	72.71	60.85	59.47	P	P	P	1.47	100	100	0.0492465
chip MOE430B	1441978_at	Aqp6	AI956846	46.16	44.45	47.49	P	P	P	71.36	68.33	63.8	P	P	P	1.47	100	100	0.0157656
chip MOE430B	1434945_at	Lpcat2	AW743924	87.43	89.73	83.12	P	P	P	129.47	123.13	129.26	P	P	P	1.47	100	100	0.00847487
chip MOE430B	1433295_at	4930449I04Rik	AK015432	29.89	28.23	27.9	P	P	P	43.5	45.31	36.95	P	P	P	1.46	100	100	0.0294558
chip MOE430B	1434756_at	Fzd4	AV292354	265.59	277.64	272.52	P	P	P	383.87	439.28	363.89	P	P	P	1.46	100	100	0.0262814
chip MOE430B	1446281_at	1446281_at	BB535418	96.44	85.85	76.51	P	P	P	123.39	131.9	122.09	P	P	P	1.46	100	100	0.0243988
chip MOE430B	1428746_a_at	Trnau1ap	AK003534	32.84	30.97	37.61	P	P	P	47.84	50.78	49.02	P	P	P	1.46	100	100	0.0240498
chip MOE430B	1457015_at	A230070E04Rik	BB258427	44.64	49.69	51.31	P	P	P	71.76	69.41	70.15	P	P	P	1.45	100	100	0.01408
chip MOE430B	1456990_at	Gm19569	BB199484	111	118.01	104.54	P	P	A	151.86	167.7	165.59	P	P	P	1.45	66	100	0.0131098
chip MOE430B	1445060_at	1445060_at	BG067592	74.57	66.49	73.04	P	P	P	103.75	98.66	105.92	P	A	P	1.44	100	66	0.00130017
chip MOE430B	1446729_at	Disp2	BB179083	156.27	157.52	154.32	P	P	P	221.49	226.7	224.18	P	P	P	1.44	100	100	0.000451177
chip MOE430B	1437643_at	Cenpj	BG068259	32.45	27.63	33.16	P	P	P	45.45	44.83	42.82	P	P	P	1.43	100	100	0.0259101
chip MOE430B	1458038_at	1458038_at	BG063073	63.96	60.26	61.62	P	P	P	92.78	82.62	87.75	P	P	P	1.42	100	100	0.00524392
chip MOE430B	1438021_at	Rbm47	BB400564	163.41	160.3	164.53	P	P	P	242.28	214.86	226.35	P	P	A	1.4	100	66	0.0120343
chip MOE430B	1446841_at	1446841_at	BB460179	214.5	221.93	218.73	P	A	P	304.72	302.71	309.14	P	P	P	1.4	66	100	0.00132819
chip MOE430B	1439940_at	Slc1a2	AV328280	486.17	502.79	476.04	P	P	P	707.29	704.96	630.9	P	P	P	1.39	100	100	0.0102915
chip MOE430B	1440866_at	Eif2ak2	AV328340	74.72	79.48	77.13	A	P	A	109.26	103.87	106.01	P	P	P	1.38	33	100	0.00991579
chip MOE430B	1435181_at	Lin54	BG073348	60.73	58.5	59.86	P	P	P	81.9	85.03	79.06	P	P	P	1.37	100	100	0.0095082
chip MOE430B	1428964_at	Slc25a18	AK005250	418.5	423.18	413.6	P	P	P	549.5	602.13	568.04	P	P	P	1.37	100	100	0.00790265
chip MOE430B	1446541_at	Wdr95	BB536995	169.71	169.6	168.75	P	P	P	241.57	227.6	226.86	P	P	P	1.37	100	100	0.00535081
chip MOE430B	1447745_at	Aqp4	AW489155	314.32	307.85	303.56	P	P	P	424.72	434.4	412.15	P	P	P	1.37	100	100	0.00244773
chip MOE430B	1428497_at	Secisbp2	AA198634	336.38	340.1	336.5	P	P	P	462.55	474.55	437.71	P	P	P	1.36	100	100	0.00679104
chip MOE430B	1453706_at	2900042A17Rik	AV152654	40.87	39.94	39.77	P	A	A	55.5	52.84	55.88	P	P	P	1.36	33	100	0.00404148
chip MOE430B	1453719_at	4930506C21Rik	AK015714	251.14	260	260.51	A	P	A	348.29	348.02	341.52	P	P	P	1.34	33	100	0.00276189
chip MOE430B	1438451_at	Arhgap32	BI408524	1088.99	1051.27	1017.18	P	P	P	777.76	791.35	777.69	P	P	P	-1.35	100	100	0.00617895
chip MOE430B	1455413_at	Zfp11	BB053703	114.85	113.88	111.15	P	P	P	80.52	87.68	79.58	P	P	P	-1.37	100	100	0.00599068
chip MOE430B	1438228_at	4930452B06Rik	AV302073	105.67	110.32	105.74	P	P	P	74.81	79.7	81.18	P	P	P	-1.37	100	100	0.00512529
chip MOE430B	1440644_at	Parp6	BB501793	69.3	67.64	68.97	P	P	P	50.24	47.56	52.82	P	A	P	-1.37	100	66	0.00405656
chip MOE430B	1429217_at	Zfp655	AK018500	172.19	180.27	173.49	P	P	P	132.6	124.44	125.04	P	P	P	-1.38	100	100	0.00944724
chip MOE430B	1456420_at	Arid4a	BB667227	175.16	177.71	187.8	P	P	P	135.65	129.31	117.76	P	P	P	-1.41	100	100	0.0283928
chip MOE430B	1436661_at	Dpp10	BQ174532	479.46	483.98	465.19	P	P	P	323.2	365.11	326.39	P	P	P	-1.41	100	100	0.00607267
chip MOE430B	1430597_at	Jakmip1	BB206614	246.13	244.03	250.89	P	P	P	168.96	167.97	187.66	P	P	P	-1.41	100	100	0.00382138
chip MOE430B	1428157_at	Gng2	AV021455	660.08	654.13	642.81	P	P	P	476.24	448.02	455.44	P	P	P	-1.42	100	100	0.00128705
chip MOE430B	1445964_at	1445964_at	BG067899	62.5	56.93	65.23	P	P	P	40.95	46.38	41.41	P	P	P	-1.43	100	100	0.0450846
chip MOE430B	1442824_at	8030497I03Rik	BB071501	127.31	129.62	121.57	P	P	P	95.43	81.93	86.43	P	P	P	-1.43	100	100	0.0155179
chip MOE430B	1432383_a_at	Armc9	AK019512	93.17	86.26	85.53	P	P	P	63.86	65.97	55.7	P	P	P	-1.43	100	100	0.0134074
chip MOE430B	1429591_at	Tacc1	BE862546	283.41	275.61	284.48	P	P	P	206.48	191.93	189.51	P	P	P	-1.43	100	100	0.00379382
chip MOE430B	1438702_at	Flrt2	BG075699	520.36	506.28	502.23	P	P	P	381.38	361.16	318.34	P	P	P	-1.44	100	100	0.00802447
chip MOE430B	1446512_at	Zc3h15	BB439838	41.95	42.09	40.21	P	P	P	28.57	28.77	28.71	P	P	A	-1.44	100	66	0.00233902
chip MOE430B	1438099_at	Trio	BB322971	85.69	77.3	85.48	P	P	P	61.71	53.08	57.78	P	P	P	-1.44	100	100	0.00224957
chip MOE430B	1441024_at	Stim2	BE996261	121.67	121.07	124.3	P	P	P	86.03	83.33	79.59	P	P	P	-1.47	100	100	0.00481454
chip MOE430B	1442539_at	1442539_at	BM119368	55.93	51.56	57.5	P	P	P	33.27	36.67	41.23	A	A	P	-1.48	100	33	0.0173369
chip MOE430B	1432643_at	4933411E06Rik	BE381593	51.12	59.36	57.86	P	P	P	36.93	40	36.37	P	P	P	-1.49	100	100	0.0136703
chip MOE430B	1458578_at	1458578_at	BB373038	135.49	143.09	152.95	P	P	P	86.02	109.06	91.76	P	P	P	-1.5	100	100	0.0255762
chip MOE430B	1440540_at	Gle1	AV228343	156.37	158.93	151.62	P	P	P	121.14	99.06	88.25	P	P	P	-1.51	100	100	0.0269667
chip MOE430B	1430746_at	1110050P16Rik	AI644298	56.47	57.14	52.31	P	P	P	33.59	40.84	35.77	P	P	P	-1.51	100	100	0.0131896
chip MOE430B	1456683_at	Sltm	BM200011	361.02	414.35	355.67	P	P	P	207.01	272.26	264.18	P	P	P	-1.52	100	100	0.0213035
chip MOE430B	1431783_at	1700010L04Rik	AK005840	60.14	60.37	57.31	P	P	P	41.68	38.48	37.15	P	A	A	-1.52	100	33	0.00240126
chip MOE430B	1441423_at	Ece1	BB344763	178.09	172.05	161.81	P	P	P	132.78	99.7	102.02	P	P	P	-1.53	100	100	0.0170007
chip MOE430B	1442913_at	Gm32444	BB456875	26.82	32.57	29.25	P	P	A	20.14	18.21	19.04	P	P	P	-1.54	66	100	0.0425223
chip MOE430B	1446504_at	1446504_at	BB207830	43.13	42.58	43.59	P	P	P	30.24	31.16	21.82	P	A	P	-1.55	100	66	0.0415596
chip MOE430B	1456592_at	1456592_at	BM241461	55.13	48.95	51.3	P	P	P	29.9	31.77	38.61	P	A	P	-1.55	100	66	0.0376517
chip MOE430B	1437625_at	1437625_at	BM238035	63.48	55.86	58.21	P	P	P	43	31.3	39.27	P	P	P	-1.56	100	100	0.00612419
chip MOE430B	1441360_at	1441360_at	AW546661	280.9	284.5	284.01	P	P	P	165.76	207.4	166.23	P	P	P	-1.57	100	100	0.015791
chip MOE430B	1457829_at	Clgn	BM199355	174.52	184.99	167.35	P	P	P	120.86	93.29	119.95	P	P	P	-1.58	100	100	0.0434087
chip MOE430B	1445278_at	Ggn	AV274286	597.93	565.3	585.09	P	P	P	455.08	317.63	332.15	A	P	A	-1.58	100	33	0.026819
chip MOE430B	1447360_at	1447360_at	AW413169	29.99	26.19	31.57	P	P	P	20.5	14.52	19.88	P	P	P	-1.6	100	100	0.00441531
chip MOE430B	1445895_at	Trbv13-2	AI450773	54.31	50.38	51.11	P	P	P	31.02	26.41	39.49	P	P	P	-1.61	100	100	0.0392655
chip MOE430B	1445441_at	Gm5142	BB018814	256.16	285.06	221.74	P	P	P	133.76	169.92	166.03	P	P	P	-1.62	100	100	0.0436651
chip MOE430B	1443313_at	A530058N18Rik	BB282582	179.85	177.59	170.97	P	P	A	130.18	106.38	90.4	P	P	P	-1.62	66	100	0.0180586
chip MOE430B	1437104_at	Arfgef1	BB711230	75.41	67.47	79.34	P	A	P	56.79	39.62	39.49	P	A	A	-1.64	66	33	0.0427218
chip MOE430B	1440397_at	Cacna2d1	BB464523	61.98	59.12	54.37	P	P	P	42.65	30.43	34	P	P	M	-1.64	100	66	0.0164655
chip MOE430B	1456141_x_at	Brcc3	BB751098	69.6	66.43	68.09	P	P	P	43.17	46	34.81	P	P	P	-1.65	100	100	0.0187689
chip MOE430B	1439004_at	Rps6ka5	BE946999	39.34	40.43	38.9	P	P	P	26.3	23.91	21.77	P	P	A	-1.65	100	66	0.00663323
chip MOE430B	1445296_at	Snhg14	BB077252	109.43	106.22	106.69	P	P	P	72.04	61.56	59.57	P	P	A	-1.67	100	66	0.00457076
chip MOE430B	1444570_at	1444570_at	BF321297	31.79	31.69	34.69	P	P	P	20.77	19	18.67	P	A	P	-1.68	100	66	0.0120921
chip MOE430B	1432746_at	6030442H21Rik	BB039422	66.87	80.35	73.48	P	P	P	37.78	44.85	48.42	P	A	A	-1.68	100	33	0.0101893
chip MOE430B	1437453_s_at	Pcsk9	AV010795	32.32	24.23	28.67	P	P	P	18.91	14.06	16.42	P	P	P	-1.73	100	100	0.00623874
chip MOE430B	1459692_at	1459692_at	AI661323	110.65	104.96	109.3	P	P	A	77.38	46.59	59.08	P	P	P	-1.78	66	100	0.0235804
chip MOE430B	1457608_at	1457608_at	BB236014	104.09	98.93	100.08	P	P	P	48.69	53.55	64.62	A	P	A	-1.82	100	33	0.0156888
chip MOE430B	1442571_at	Apela	BM203260	30.16	25.37	30.06	P	P	P	9.43	13.95	19.33	P	A	A	-2	100	33	0.0473102
chip MOE430B	1438247_at	Klhl15	AI596396	80.83	72.33	66.29	P	P	P	41.87	34.79	30.07	P	A	A	-2.06	100	33	0.000443062
chip MOE430B	1435575_at	Kntc1	AW536884	33.63	25.67	32.07	P	P	P	17.11	10.05	16.9	P	A	A	-2.07	100	33	0.00063271
